# Supplementary material for: Highly efficient ratiometric nanothermometers based on colloidal carbon quantum dots
Source: Royal Society of Chemistry journal article supplement (doi:10.1039/d1tb00224d), 2021-01-01
Supplement: d1tb00224d1.pdf [file d1tb00224d1.pdf]

## Supporting information

### Highly Efficient Ratiometric Nanothermometer based on Colloidal Carbon

#### Quantum Dots

Yi Han<sup>1</sup>, Yanran Liu<sup>1</sup>, Haiguang Zhao<sup>2, \*</sup>, Alberto Vomiero<sup>3,4, \*</sup>, and Ronggui Li<sup>5, \*</sup>

<sup>1</sup>School of basic medicine, Qingdao University, No. 308 Ningxia Road, Qingdao 266071, PR China

<sup>2</sup>State Key Laboratory of Bio-Fibers and Eco-Textiles & College of Physics, Qingdao University, No. 308 Ningxia Road, Qingdao 266071, PR China

<sup>3</sup>Division of Materials Science, Department of Engineering Sciences and Mathematics, Luleå University of Technology, 971 87 Luleå, Sweden

<sup>4</sup>Department of Molecular Science and Nano Systems, Ca' Foscari University of Venice Via Torino 155, 30172 Venezia Mestre, Italy

<sup>5</sup>College of Life Sciences, Qingdao University, No. 308 Ningxia Road, Qingdao 266071, PR China

\*Correspondence: hgzhao@qdu.edu.cn; Alberto.vomiero@ltu.se; lrg@qdu.edu.cn

#### Supporting figures

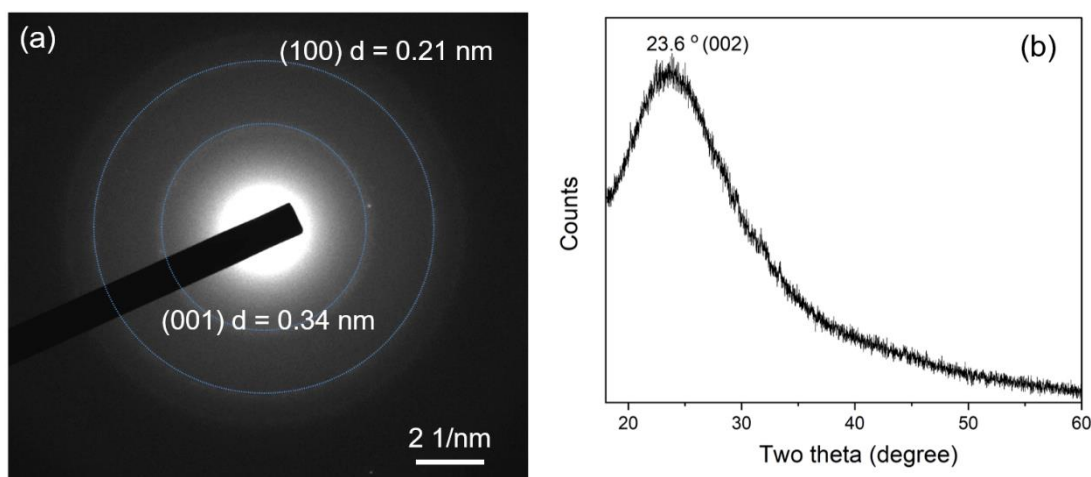

**Fig. S1.** SAED image (a) and powder XRD spectrum (b) of the C-dots capped with

OH group.

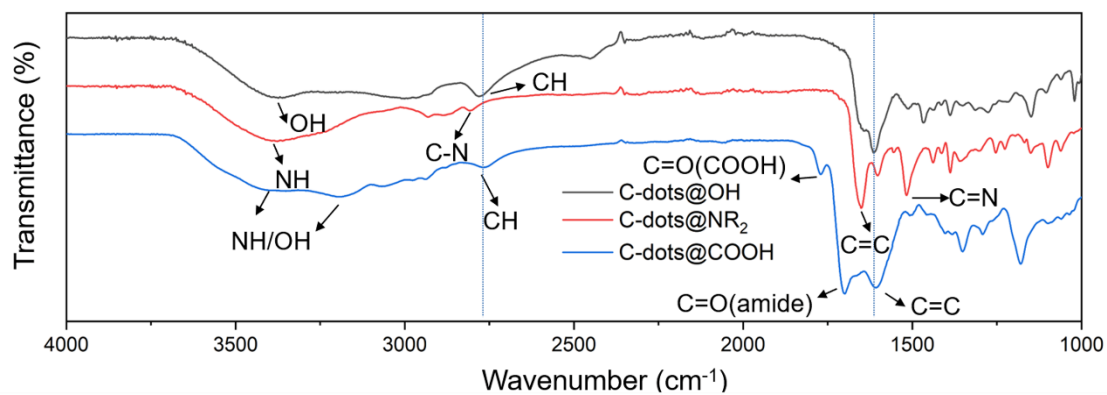

**Fig. S2.** FT-IR spectra of C-dots with different surface groups.

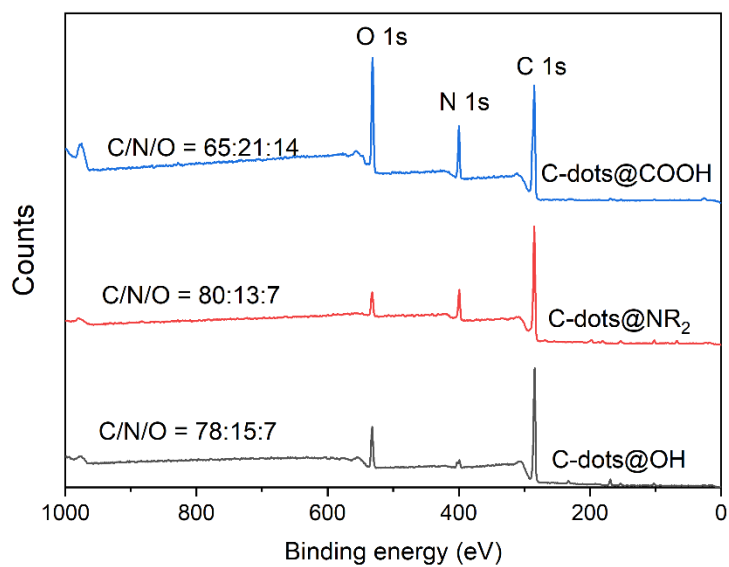

**Fig. S3.** XPS survey spectra of C-dots with different surface groups.

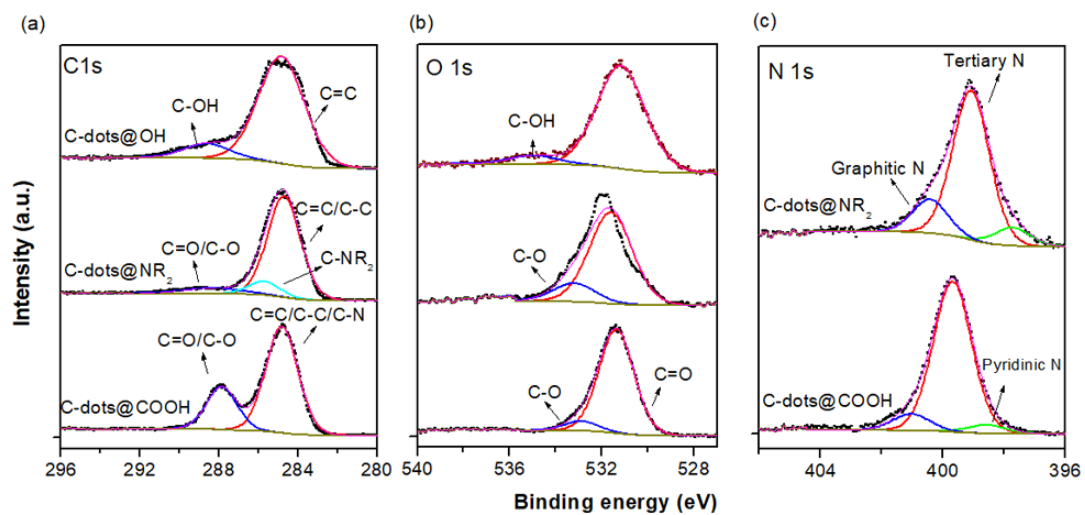

**Fig. S4.** High resolution (a) C1s, (b) O1s and N1s XPS spectra of C-dots with different surface groups.
